# Supplementary material for: Wnt7b signalling through Frizzled-7 receptor promotes dendrite development by coactivating CaMKII and JNK
Source: Oxford University Press journal article supplement (doi:10.1242/jcs.216101), 2018-06-15

**Fig. S1. Fz7 rescues the defects on dendritic complexity induced by Fz7 blockage.**

(A) Representative images of 3 DIV neurons expressing EGFP, Fz7 shRNA or both Fz7 shRNA and MycFz7. Quantification shows total dendritic length (B) and TDBTN (C) for each condition. \*\*\*\*  $p < 0.0001$  compared to EGFP and ++++  $p < 0.0001$  compared to Fz7 shRNA. (D and E) Quantitative analysis of total dendritic length and TDBTN from EGFP or ssRNA expressing neurons. Error bars represent mean  $\pm$  SEM. Scale bar: 10  $\mu\text{m}$ .

A)

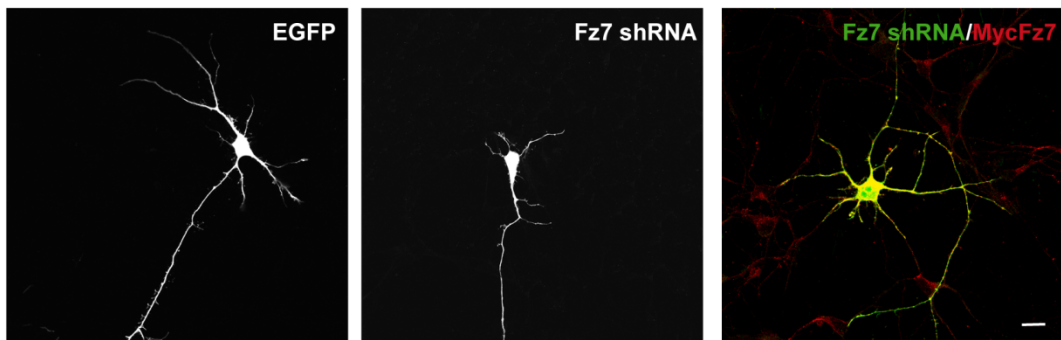

B)

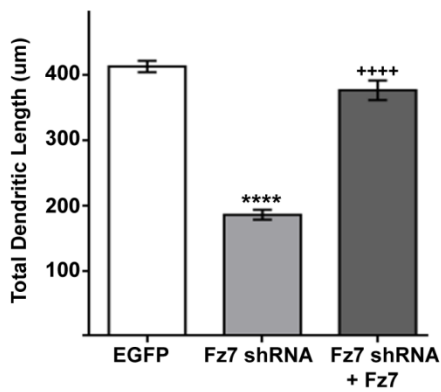

C)

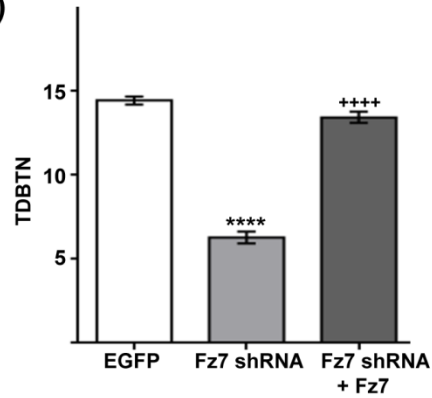

D)

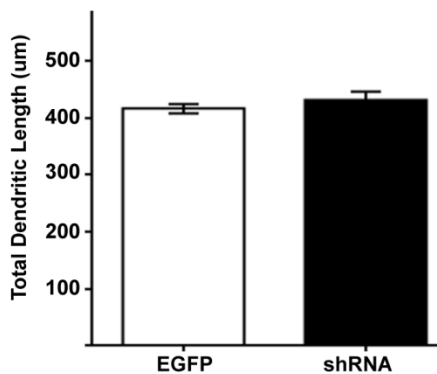

E)

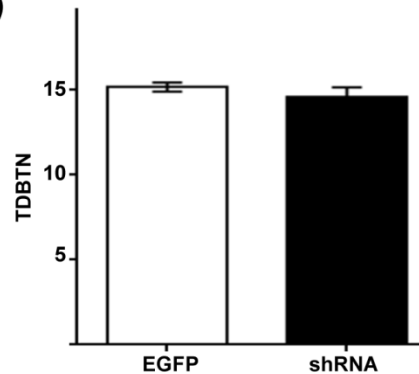

Supplement: jcs216101supp.pdf [file jcs216101supp.pdf]
